# Supplementary material for: High performance achieved via core engineering and side-chain engineering in organic solar cells based on the penta-fused-ring acceptor
Source: Royal Society of Chemistry journal article supplement (doi:10.1039/d2tc00725h), 2022-01-01
Supplement: d2tc00725h1.pdf [file d2tc00725h1.pdf]

## *Supporting Information*

### **High Performance Achieved via Core Engineering and Side-Chain Engineering in Organic Solar Cells Based on Penta-Fused-Ring**

#### **Acceptor**

Fengting Li,<sup>a,b</sup> Yongjie Chen,<sup>c</sup> Xin-Heng Fan,<sup>a</sup> Cai-Yan Gao,<sup>a</sup> Xiaozhang Zhu,<sup>\*c</sup> and  
Lian-Ming Yang<sup>\*a</sup>

---

*a Beijing National Laboratory for Molecular Sciences (BNLMS), Key Laboratory of Green  
Printing, Institute of Chemistry, Chinese Academy of Sciences, Beijing, China*

*b University of Chinese Academy of Sciences, Beijing, China*

*c CAS Key Laboratory of Organic Solids, Institute of Chemistry, Chinese Academy of  
Sciences, Beijing, China.*

## Experimental Section

### 1. Materials

PM6 and TPBT-CHO was purchased from Derthon. 4,7-Dibromo-5,6-dinitrobenzo[c][1,2,5]thiadiazole and the terminal unit DPBT-2Cl, 2-(5,6-dichloro-3-oxo-2,3-dihydro-1H-inden-1-ylidene)malononitrile, was purchased from Wuxi Seniormaterial, Other drugs used were purchased from Innochem without further purification.

### 2. Fabrication of OPVs

OPVs were fabricated in the conventional device architecture of ITO/PEDOT:PSS/Active layer/PFN-Br/Al. A 40 nm thin layer of PEDOT:PSS (poly(3,4-ethylene dioxythiophene):poly(styrene sulfonate)) (Baytron PVP Al 4083) was coated on the pre-cleaned ITO substrates, and baked at 150 °C for 15 min in the air. PM6: DPBT-2Cl was dissolved in chloroform (CF) and spin-cast at 3,000 rpm for 30 s onto the PEDOT: PSS layer, and thermal annealed (TA) at 110 °C for 10 min. The thickness of the photoactive layer is about 100 nm measured by ambios technology XP-2 profilometer. A thin layer of PFN-Br (about 5 nm) was coated onto the active layers from its ethyl alcohol solution (0.5 mg/mL). Subsequently, Al (about 150 nm) was thermally evaporated deposited atop under a shadow mask with a base pressure of ca.  $10^{-5}$  Pa. The active area of 4 mm<sup>2</sup> was used in the *J-V* measurements.

**Table S1** Condition with different ratio of PM6: DPBT-2Cl (D:A), and total of 16 mg/ml, dissolved in CF at 40 °C for 4h, TA at 110 °C for 10min.

| D:A   | $V_{oc}$ (V) | $J_{sc}/EQE$ (mA/cm <sup>2</sup> ) | FF (%) | PCE (%) | Thickness (nm) |
|-------|--------------|------------------------------------|--------|---------|----------------|
| 1:1.0 | 0.807        | 21.37                              | 58.6   | 10.11   |                |
|       | 0.811        | 21.08/20.56                        | 59.6   | 10.20   | 98             |
|       | 0.805        | 20.86                              | 58.4   | 9.80    |                |
| 1:1.2 | 0.810        | 21.70/21.02                        | 59.9   | 10.52   |                |
|       | 0.807        | 21.68                              | 60.2   | 10.54   | 93             |
|       | 0.811        | 21.21                              | 60.0   | 10.33   |                |
| 1:1.4 | 0.805        | 21.78                              | 54.0   | 9.47    |                |
|       | 0.805        | 21.95/21.31                        | 58.1   | 10.26   | 101            |
|       | 0.807        | 21.63                              | 57.5   | 10.03   |                |

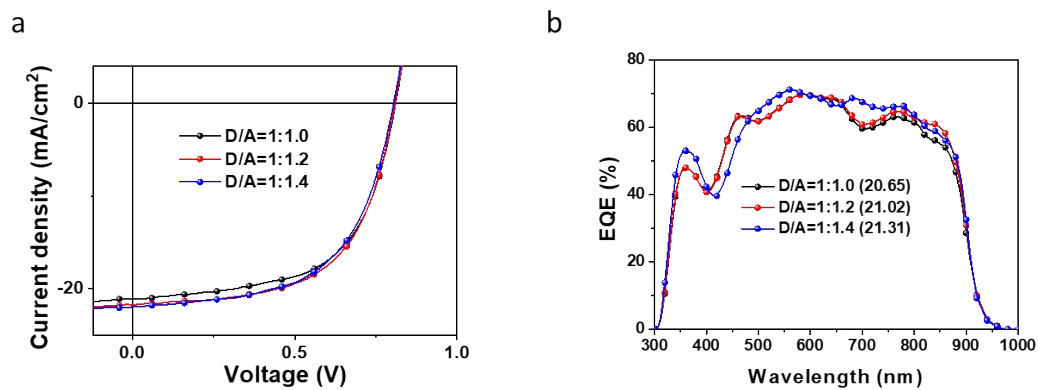

**Figure S1** a.  $J$ - $V$  and b. EQE curves with different ratio of PM6/ DPBT-2Cl.

**Table S2** Condition with different ratio of additive, and PM6: DPBT-2Cl=1:1.2, total of 16 mg/ml, dissolved in CF at 40 °C for 4h, TA at 110 °C for 10 min.

| Additive  | $V_{oc}$<br>(V) | $J_{sc}/EQE$<br>(mA/cm <sup>2</sup> ) | FF<br>(%) | PCE<br>(%) | Thickness<br>(nm) |
|-----------|-----------------|---------------------------------------|-----------|------------|-------------------|
| 0.50% CN  | 0.774           | 23.00                                 | 62.9      | 11.21      |                   |
|           | 0.778           | 23.05/22.83                           | 62.8      | 11.28      | 97                |
|           | 0.778           | 22.22                                 | 63.6      | 11.02      |                   |
| 0.75% CN  | 0.770           | 22.78                                 | 63.8      | 11.20      |                   |
|           | 0.776           | 23.08/22.98                           | 64.0      | 11.49      | 98                |
|           | 0.772           | 22.96                                 | 63.7      | 11.31      |                   |
| 1.00% CN  | 0.773           | 23.06                                 | 62.4      | 11.14      |                   |
|           | 0.772           | 22.70/22.24                           | 64.9      | 11.40      | 94                |
|           | 0.769           | 23.00                                 | 62.8      | 11.13      |                   |
| 0.50% DIO | 0.701           | 9.18                                  | 44.7      | 2.88       |                   |
|           | 0.702           | 9.34/3.41                             | 45.7      | 3.00       | 101               |
|           | 0.701           | 9.20                                  | 44.2      | 2.86       |                   |

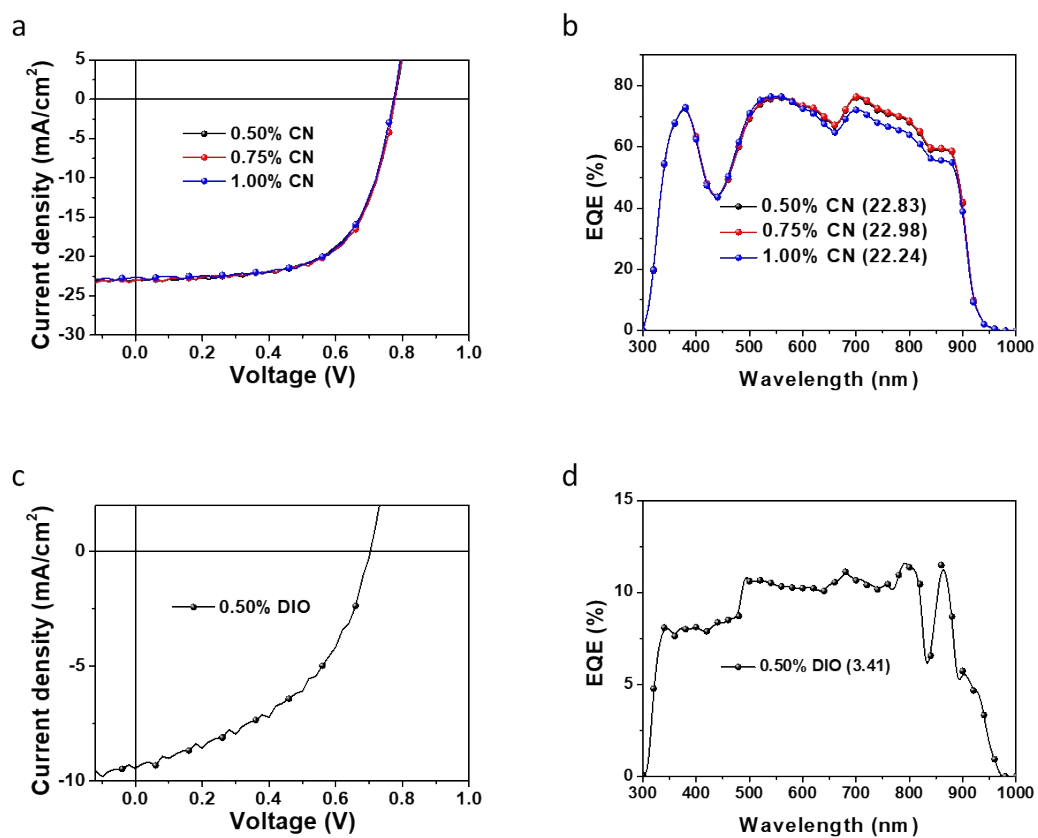

**Figure S2**  $J$ - $V$  and EQE curves of PM6/ DPBT-2Cl with different additive.

**Table S3.** TA at 110°C or as-cast, and PM6: DPBT-2Cl = 1:1.2, total of 16 mg/ml, dissolved in CF at 40°C for 4h, with additive CN 0.75 %.

| TA/as-cast | $V_{oc}$<br>(V) | $J_{sc}/EQE$<br>(mA/cm <sup>2</sup> ) | FF<br>(%) | PCE<br>(%) | Thickness<br>(nm) |
|------------|-----------------|---------------------------------------|-----------|------------|-------------------|
| as-cast    | 0.818           | 16.81/16.70                           | 60.3      | 8.27       |                   |
|            | 0.817           | 16.63/15.39                           | 61.2      | 8.28       | 95                |
|            | 0.814           | 16.46                                 | 60.2      | 8.04       |                   |
| TA         | 0.770           | 22.78                                 | 63.8      | 11.20      |                   |
|            | 0.776           | 23.08/22.98                           | 64.0      | 11.49      | 98                |
|            | 0.772           | 22.96/22.87                           | 63.7      | 11.31      |                   |

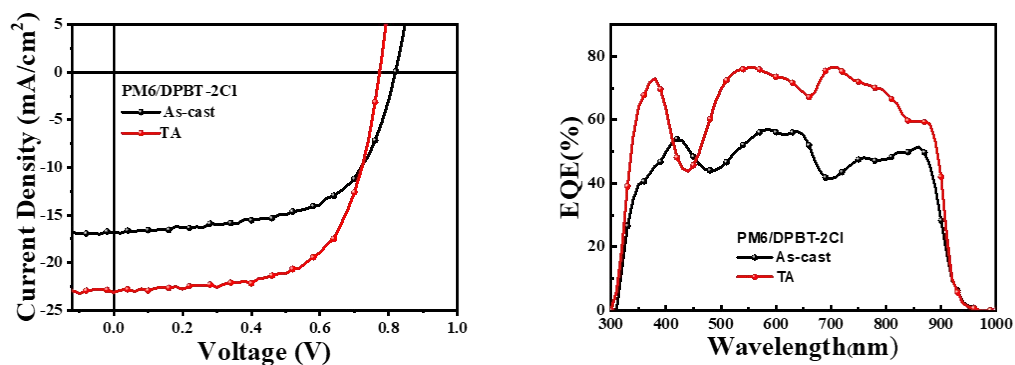

**Figure S3**  $J$ - $V$  and EQE curves of PM6/ DPBT-2Cl with TA or as-cast.

**Table S4** TA at 110°C or as-cast and with or without additive CN, PM6: TPBT-2Cl = 1:1.2, total of 14 mg/ml, dissolved in CF at 40°C for 4h.

| D/A          | TA (°C) | Additive | $V_{oc}$ (V) | $J_{sc}$ (mA/cm <sup>2</sup> ) | FF (%) | PCE (%) | Thickness (nm) |
|--------------|---------|----------|--------------|--------------------------------|--------|---------|----------------|
| PM6:TPBT-2Cl | As-cast | 0        | 0.74         | 3.56                           | 36.4   | 0.95    | 96             |
| PM6:TPBT-2Cl | 110     | 0        | 0.68         | 2.47                           | 0.37   | 0.70    | 96             |
| PM6:TPBT-2Cl | As-cast | 0.5%     | 0.69         | 2.02                           | 47.0   | 0.65    | 98             |
| PM6:TPBT-2Cl | 110     | 0.5%     | 0.68         | 1.89                           | 0.41   | 0.52    | 97             |

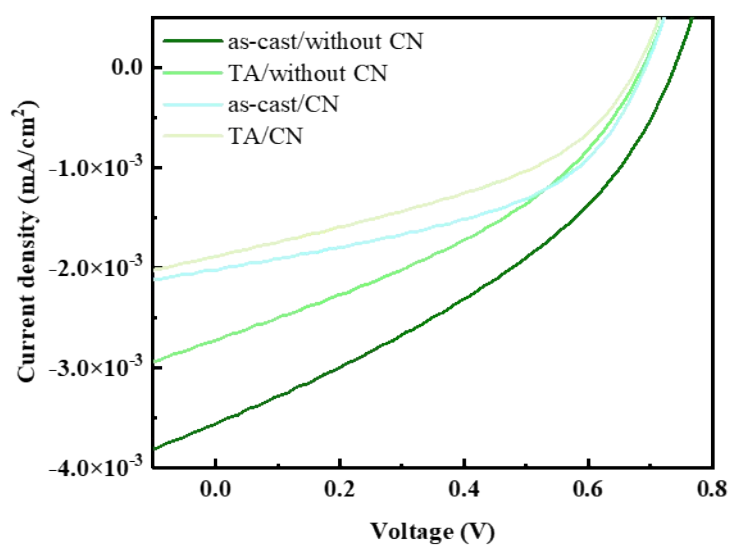

**Figure S4**  $J$ - $V$  curves of PM6/ TPBT-2Cl with TA/as-cast and with/without CN.

### 3. Characterization of Materials

Unless otherwise noted, Bruker AV-400 spectrometer was used to record  $^1\text{H}$  and  $^{13}\text{C}$  NMR spectra in deuterated chloroform solution at 298K. Chemical shifts are reported as  $\delta$  values (ppm) and tetramethylsilane (TMS) is used as an internal reference. The molecular mass was confirmed by Autoflex III matrix-assisted laser desorption ionization mass spectrometer (MALDI-TOF-MS). The Thermogravimetric analysis (TGA) data were obtained by testing on the TG-209F3 instrument at the National Center for Nanoscience and Technology.

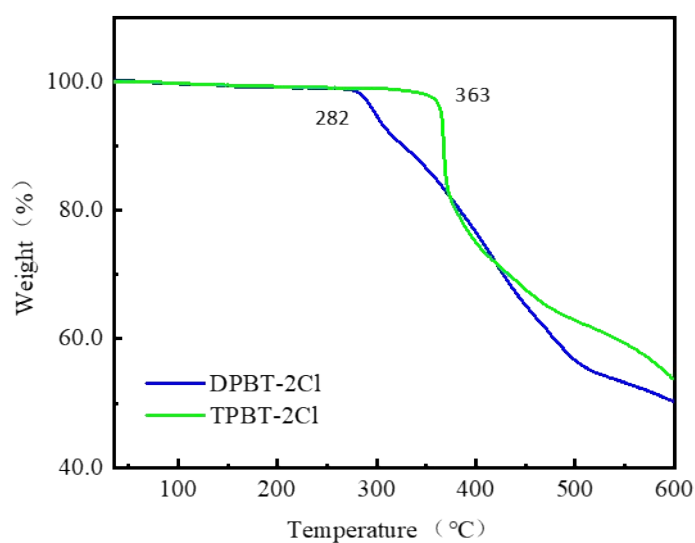

**Figure S5.** The TGA curves of DPBT-2Cl and TPBT-2Cl.

#### 4. Instruments and Measurements

UV-Vis absorption spectra were recorded on the SHIMADZU UV-1800 spectrophotometer, and the scanning range was set to 350–1000 nm. For the solution measurements, PM6, DPBT-2Cl and TPBT2Cl were dissolved in  $\text{CHCl}_3$ . For the solid-state measurements, PM6/DPBT-2Cl and PM6/TPBT-2Cl solutions in chloroform were spin coated on quartz plates to form relevant blend films.

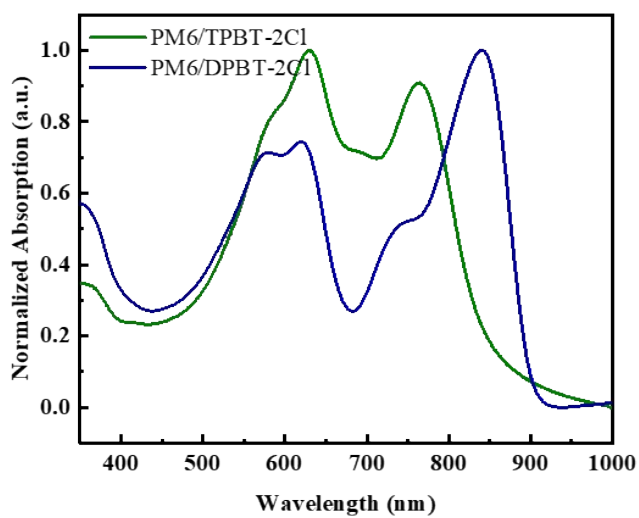

**Figure S6** The blend film absorption spectra of PM6/DPBT-2Cl and PM6/TPBT-2Cl.



Cyclic voltammetry results were obtained with a computer-controlled CHI 660E electrochemical workstation using acceptor films on platinum (1.0 mm<sup>2</sup>) as the working electrode, a platinum wire as the counter electrode, and Ag/AgCl (0.1 M) as the reference electrode in an anhydrous argon saturated solution of 0.1 M tetrabutylammonium hexafluorophosphate (Bu<sub>4</sub>NPF<sub>6</sub>) in acetonitrile, at a scanning rate of 50 mV/s. Electrochemical onsets were determined at the position where the current started to rise from the baseline.

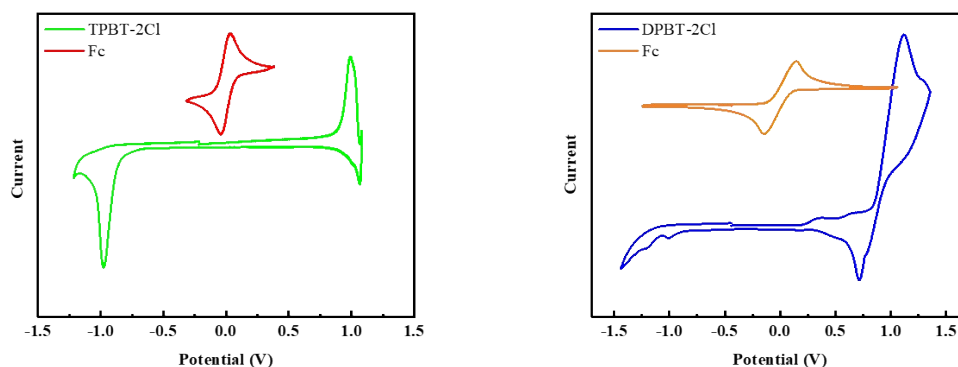

**Figure S7.** Cyclic voltammetry curves of DPBT-2Cl and TPBT-2Cl based on ferrocene (Fc) correction.

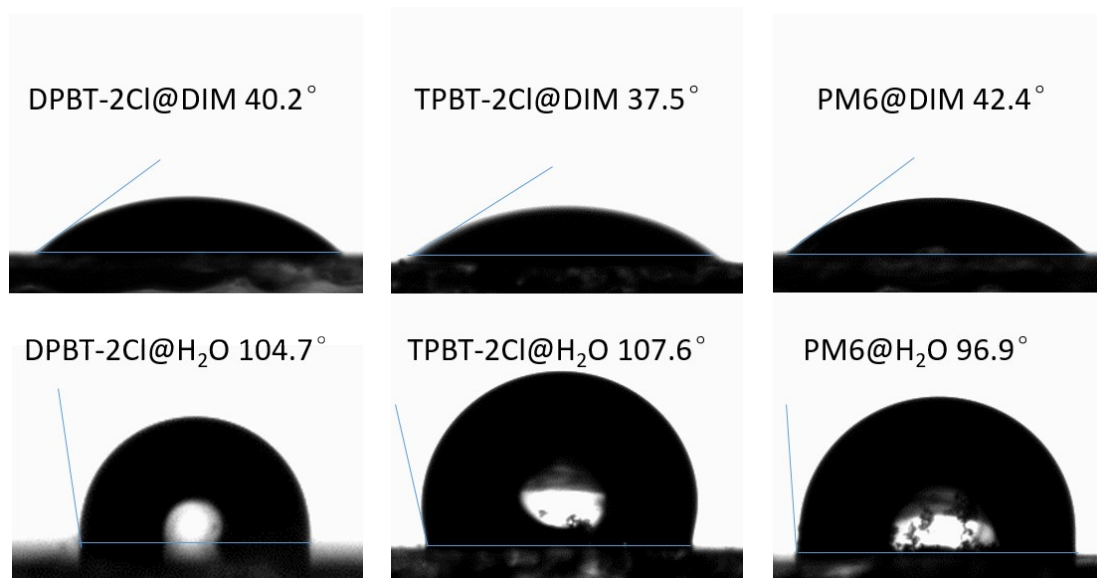

**Figure S8.** Contact angles of DPBT-2Cl, TPBT-2Cl and PM6 on H<sub>2</sub>O and DIM.

**Table S5.** Surface energy characteristics of PM6, TPBT-2Cl and DPBT-2Cl pristine films.

| Materials | $\theta_{\text{CH}_2\text{I}_2}/^\circ$ | $\theta_{\text{H}_2\text{O}}/^\circ$ | $\gamma/\text{mNm}^{-1}$ | $\gamma^p/\text{mNm}^{-1}$ | $\gamma^d/\text{mNm}^{-1}$ |
|-----------|-----------------------------------------|--------------------------------------|--------------------------|----------------------------|----------------------------|
| PM6       | 42.40                                   | 96.90                                | 39.00                    | 0.30                       | 38.70                      |
| TPBT-2Cl  | 37.50                                   | 107.60                               | 45.05                    | 0.41                       | 44.64                      |
| DPBT-2Cl  | 40.20                                   | 104.70                               | 42.27                    | 0.08                       | 42.19                      |

The  $J$ - $V$  measurements were performed on the solar simulator along with AM 1.5G spectra (100 mW/cm<sup>2</sup>). The EQE measurements were tested on the solar cell spectral response measurement system. AFM (with Nanoscope AFM microscope (Bruker)) and GIWAXS (with XEUSS SAXS/WAXS system (XENOCSS, France)) measurements were performed at Engineering Plastics Laboratory, Institute of Chemistry, Chinese Academy of Sciences (ICCAS, Beijing). The transmission electron microscopy (TEM) were obtained on the field emission transmission electron microscope JEM-F200 at the Beijing Regional Center for Matter and Nanoscience.

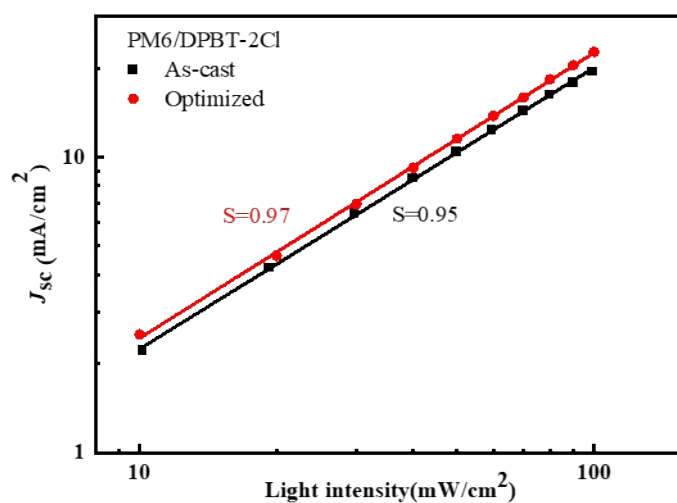

**Figure S9.**  $J_{sc}$  vs light intensity of PM6/DPBT-2Cl based on as-cast or optimized.

**Table S6.** Mobilities of as-cast and optimized blend films of PM6:P4-IC2Cl.

| Conditions | $\mu_h$ [ $\text{cm}^2 \text{V}^{-1} \text{s}^{-1}$ ] | $\mu_e$ [ $\text{cm}^2 \text{V}^{-1} \text{s}^{-1}$ ] | $\mu_h/\mu_e$ |
|------------|-------------------------------------------------------|-------------------------------------------------------|---------------|
| As-cast    | $3.2 \times 10^{-4}$                                  | $2.3 \times 10^{-4}$                                  | 1.39          |
| Optimized  | $5.9 \times 10^{-4}$                                  | $5.3 \times 10^{-4}$                                  | 1.11          |

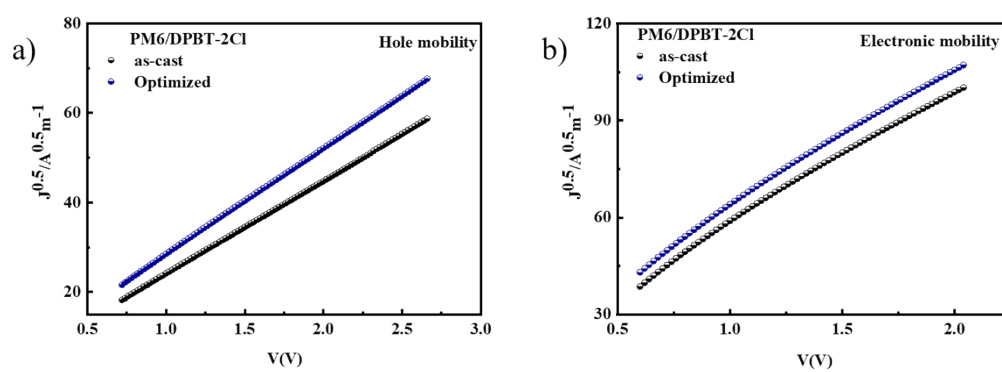

**Figure S10.** Hole/electronic mobility of PM6/DPBT-2Cl in as-cast and optimized blend films.

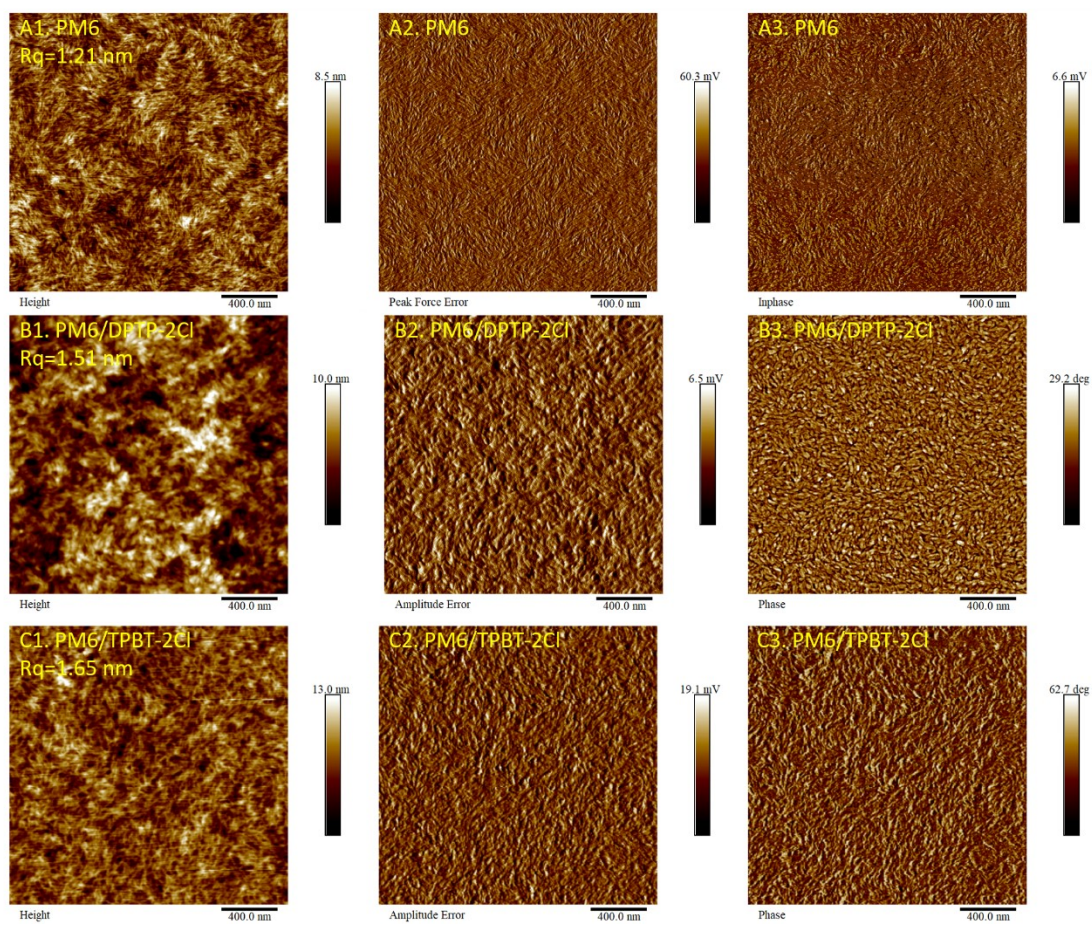

**Figure S11** AFM height/amplitude error/phase patterns of films for A1/A2/A3 (PM6), B1/B2/B3 (PM6/DPBT-2Cl), and C1/C2/C3 (PM6/TPBT-2Cl).

## 5. Synthesis

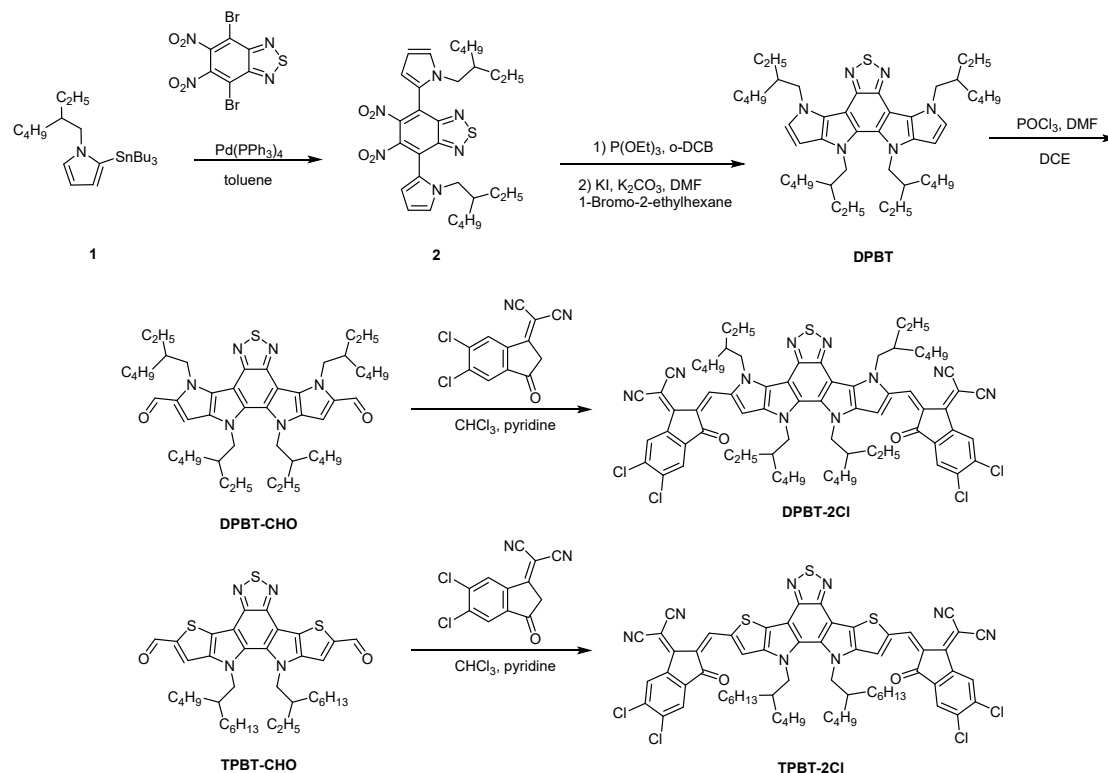

**Scheme S1.** Synthetic routes of DPBT-2Cl and TPBT-2Cl.

### Synthesis of compound **2**

A mixture of compound **1** (9.38 g, 20 mmol), 4,7-dibromo-5,6-dinitrobenzo[*c*][1,2,5]thiadiazole (3.80 g, 9.95 mmol) and  $\text{Pd}(\text{PPh}_3)_4$  (460 mg, 0.40 mmol) were dissolved in dry toluene (100 mL) under argon atmosphere, stirred and heated at 110 °C for 16 h. After being cooled to room temperature, the reaction mixture was extracted by ethyl acetate three times. The combined organic phase was dried over anhydrous  $\text{Na}_2\text{SO}_4$ , filtered, and concentrated by reduced pressure rotary evaporation. The compound **2** was obtained from silica-gel column chromatography as a dark red solid which was directly used in the next experiment (5.22 g, 90% yield).

$^1\text{H}$  NMR (300 MHz, Chloroform-*d*)  $\delta$  7.09 – 6.44 (m, 4H), 6.23 – 6.04 (m, 2H), 4.02 (d,  $J = 7.5$  Hz, 4H), 1.83 – 1.66 (m, 2H), 1.28 – 1.20 (m, 16H), 0.99 – 0.77 (m, 12H).  $^{13}\text{C}$  NMR (75 MHz, Chloroform-*d*)  $\delta$  127.82, 121.98, 121.07, 108.00, 107.64, 83.04, 53.27, 41.66, 30.51, 28.60, 23.66, 23.13, 14.10, 10.49.

### Synthesis of DPBT

A mixture of compound **2** (4.0 g, 6.89 mmol) and  $\text{P}(\text{OEt})_3$  (20 mL) were dissolved in *o*-DCB (20 mL) under argon atmosphere, heated at 180 °C for 18 h. After cooling to room temperature, the reaction mixture was extracted by  $\text{CHCl}_3$  three times. The combined organic phase was dried over anhydrous  $\text{Na}_2\text{SO}_4$ , filtered and concentrated by reduced pressure rotary evaporation. The residue, 1-bromo-2-ethylhexane (3.84 g, 20 mmol), KOH (1.12 g, 20 mmol), KI (16.5 mg, 0.1 mmol), and DMF (50 mL) were added into a three-necked round bottom flask, then deoxygenated with argon

for 20 min. Heated and stirred at 80 °C for 18 h. After cooling to room temperature, the mixture was extracted with CH<sub>2</sub>Cl<sub>2</sub> and brine, dried over Na<sub>2</sub>SO<sub>4</sub>, filtered and concentrated by reduced pressure rotary evaporation. The crude product of DPBT (2.0 g, about 2.7 mmol, 40 % yield) was directly used in the next reaction after passing through a fast silica gel column with CH<sub>2</sub>Cl<sub>2</sub> : Petroleum ether = 1: 2. HR-MS (MALDI-TOF) m/z calcd. for (C<sub>46</sub>H<sub>72</sub>N<sub>6</sub>S): 740.5531. Found: 740.5534.

#### Synthesis of DPBT-CHO

To a solution of crude DPBT (1.00 g, about 1.35 mmol) in dry 1,2-dichloroethane (DCE) (100 mL) were added POCl<sub>3</sub> (562 mg, 3.70 mmol) and DMF (270 mg, 3.70 mmol) under argon atmosphere. The reaction mixture was stirred in an ice bath for 5 h, and then heated at 85 °C for 12 h. After cooling to room temperature, the reaction mixture was extracted by CHCl<sub>3</sub> three times. The combined organic phase was dried over anhydrous Na<sub>2</sub>SO<sub>4</sub>, filtered and concentrated by reduced pressure rotary evaporation. The pure DPBT-CHO was obtained from silica gel column chromatography as an orange solid (860 mg, about 80 % yield).

<sup>1</sup>H NMR (300 MHz, Acetone-*d*<sub>6</sub>) δ 9.70 (s, 2H), 7.17 (s, 2H), 5.47 – 5.14 (m, 4H), 4.59 (d, *J* = 7.4 Hz, 4H), 2.07 (d, *J* = 7.7 Hz, 4H), 1.34 (m, 8H), 1.17 – 0.80 (m, 32H), 0.78 – 0.42 (m, 24H). <sup>13</sup>C NMR (75 MHz, Acetone-*d*<sub>6</sub>) δ 179.23, 147.35, 136.71, 135.39, 134.07, 103.30, 51.95, 41.40, 38.66, 30.04, 27.37, 23.53, 22.90, 22.85, 22.55, 13.48, 13.18, 10.46, 9.61.

#### Synthesis of DPBT-2Cl

Compound DPBT-CHO (600 mg, 0.75 mmol) and 2-(5,6-dichloro-3-oxo-2,3-dihydro-1H-inden-1-ylidene)malononitrile (IC2Cl) (589 mg, 2.25 mmol) were dissolved in dry chloroform (80 mL) under argon atmosphere. Added pyridine (0.1 mL), stirred for 24 h at 65 °C. After cooling to room temperature, the reaction mixture was extracted by CHCl<sub>3</sub> three times. The combined organic phase was dried over anhydrous Na<sub>2</sub>SO<sub>4</sub>, filtered and concentrated by reduced pressure rotary evaporation. The pure DPBT-2Cl was obtained from silica gel column chromatography as a black solid (578 mg, 60% yield).

<sup>1</sup>H NMR (400 MHz, CDCl<sub>3</sub>) δ 8.80 (s, 1H), 8.63 (s, 2H), 7.88 (s, 1H), 5.14 (br. s, 2H), 4.43 (d, *J* = 7.6 Hz, 2H), 2.19–2.04 (m, 1H), 2.03–1.91 (m, 1H), 1.38–1.24 (m, 4H), 1.22–0.87 (m, 12H), 0.86–0.65 (m, 12H). <sup>13</sup>C NMR (100 MHz, CDCl<sub>3</sub>) δ 185.05, 159.99, 147.04, 140.23, 138.56, 138.45, 138.41, 136.72, 136.67, 136.52, 129.68, 126.27, 124.58, 119.09, 115.76, 115.15, 108.63, 104.60, 66.34, 54.19, 51.07, 42.42, 42.31, 38.65, 29.97, 29.87, 28.39, 28.31, 27.84, 23.55, 23.30, 23.24, 23.06, 23.01, 22.76, 13.92, 13.76, 10.78, 10.74, 10.03. HR-MS (MALDI-TOF) m/z calcd. for (C<sub>58</sub>H<sub>82</sub>N<sub>4</sub>O<sub>2</sub>S<sub>5</sub>): 1284.4622. Found: 1284.4622.

#### Synthesis of TPBT-2Cl

Compound TPBT-CHO (718 mg, 1.00 mmol) and 2-(5,6-dichloro-3-oxo-2,3-dihydro-1H-inden-1-ylidene)malononitrile (IC2Cl) (789 mg, 3.00 mmol) were dissolved in dry chloroform (80 ml) under argon atmosphere. Added pyridine (0.1 ml), stirred for 24 h at 65 °C. After cooling to room temperature, the reaction mixture was extracted by CHCl<sub>3</sub> three times. The combined organic phase was dried over anhydrous Na<sub>2</sub>SO<sub>4</sub>, filtered and concentrated by reduced pressure rotary evaporation. The pure DPBT-2Cl was obtained from silica gel column chromatography as a dark blue solid (578 mg, 60% yield).

<sup>1</sup>H NMR (400 MHz, Chloroform-*d*) δ 8.93 (s, 1H), 8.75 (s, 1H), 7.97 (s, 1H), 7.975 (s, 1H), 4.58 (d, *J* = 8.0 Hz, 2H), 2.16–2.09 (m, 1H), 1.18–0.86 (m, 16H), 0.77–0.66 (m, 6H). <sup>13</sup>C NMR (175 MHz, Chloroform-*d*) δ 185.55, 158.17, 147.45, 146.89, 140.31, 139.83, 139.66, 138.99, 138.71,





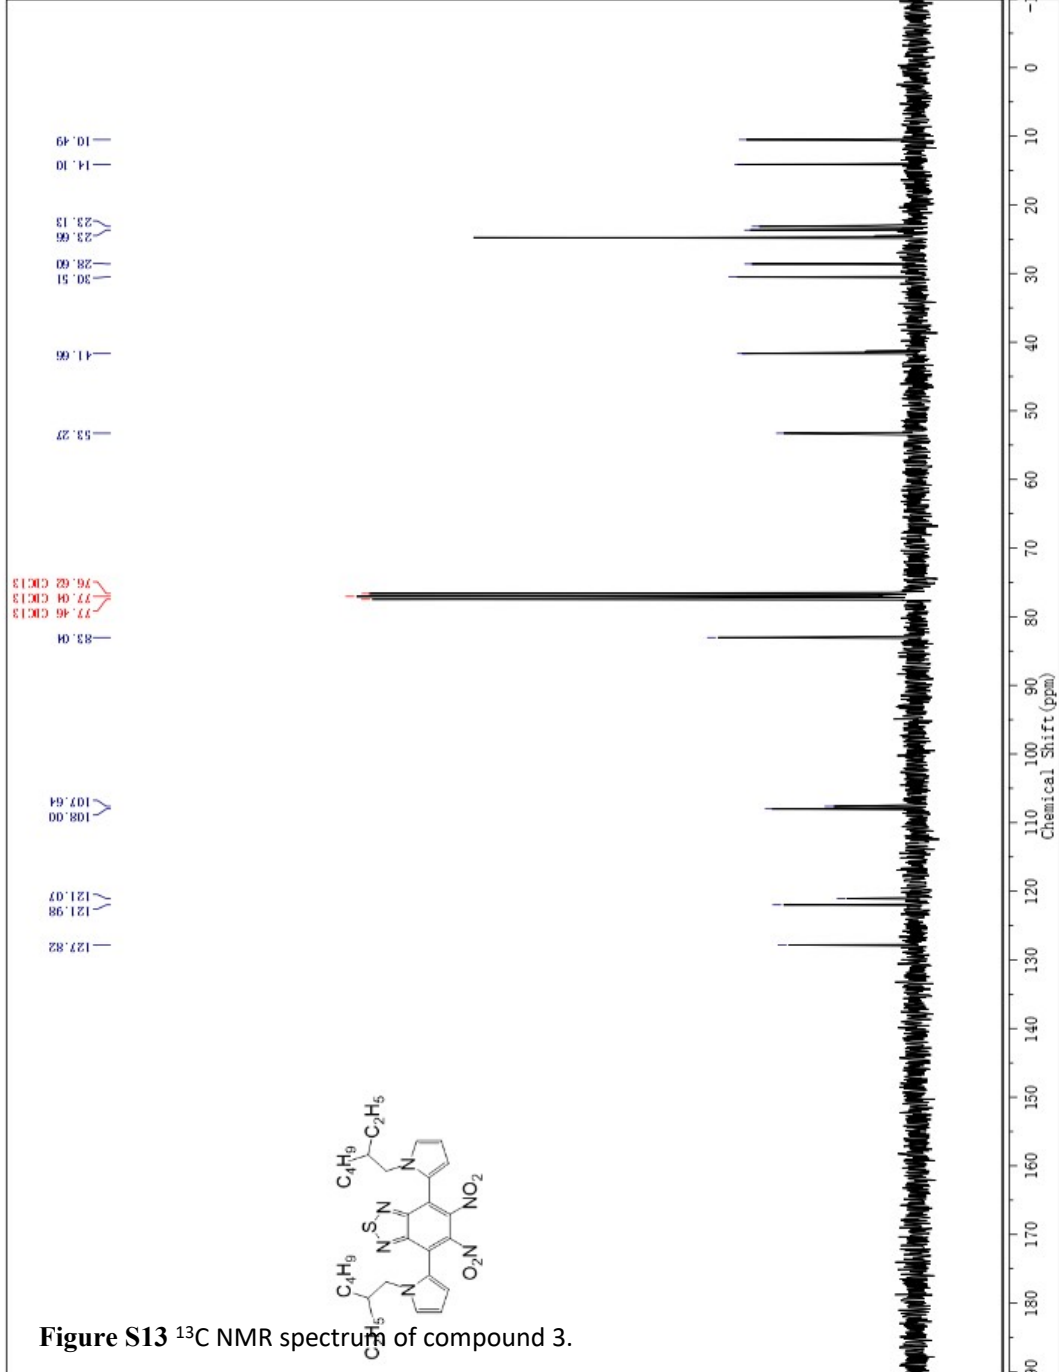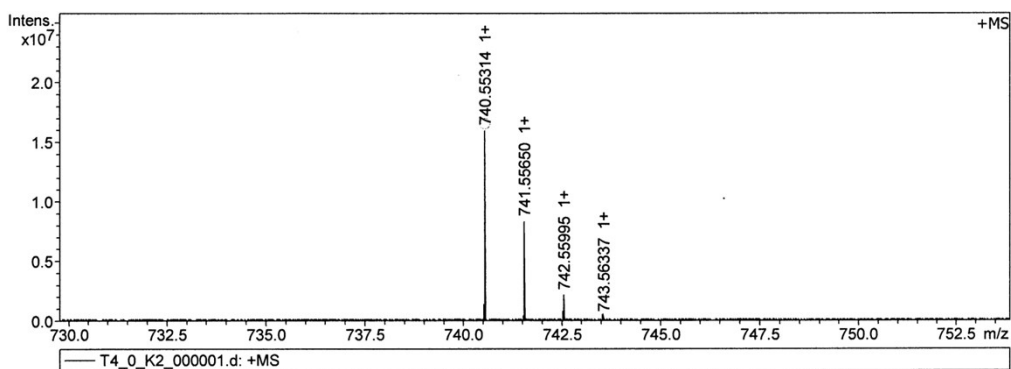

| Meas. m/z  | # | Ion Formula                                      | Score  | m/z        | err [ppm] | Mean err [ppm] | mSigma | rdb  | e <sup>-</sup> Conf | N-Rule |
|------------|---|--------------------------------------------------|--------|------------|-----------|----------------|--------|------|---------------------|--------|
| 740.553141 | 1 | C <sub>46</sub> H <sub>72</sub> N <sub>6</sub> S | 100.00 | 740.553369 | 0.3       | 0.2            | 86.0   | 14.0 | odd                 | ok     |

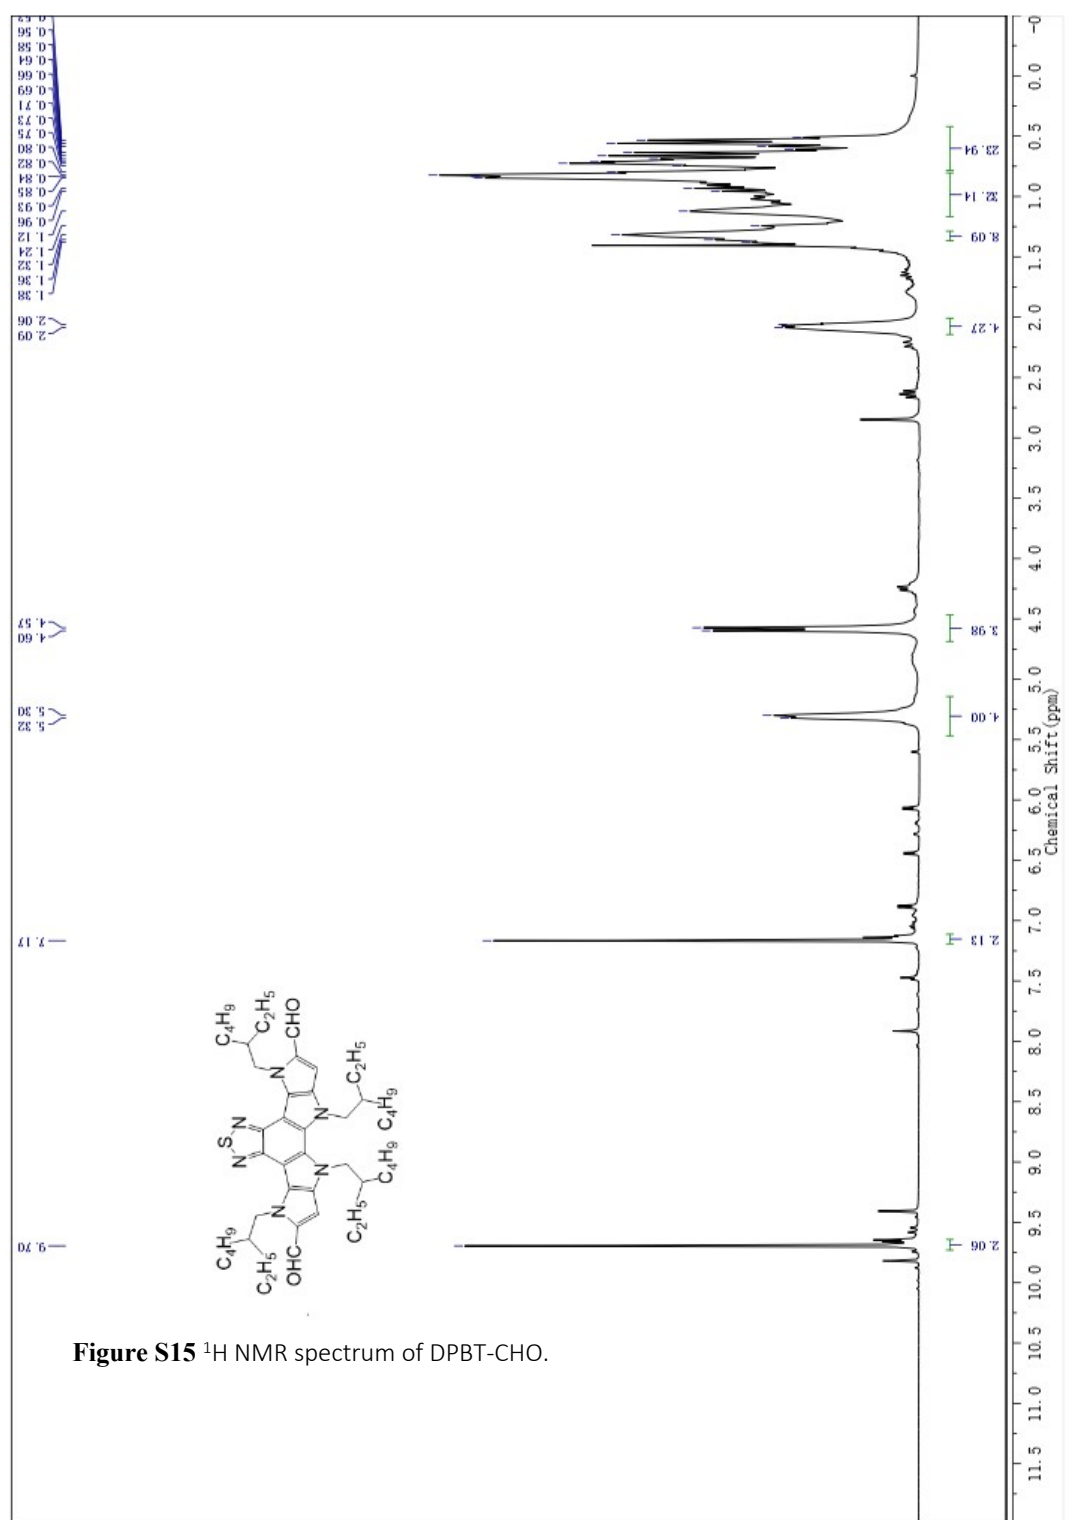

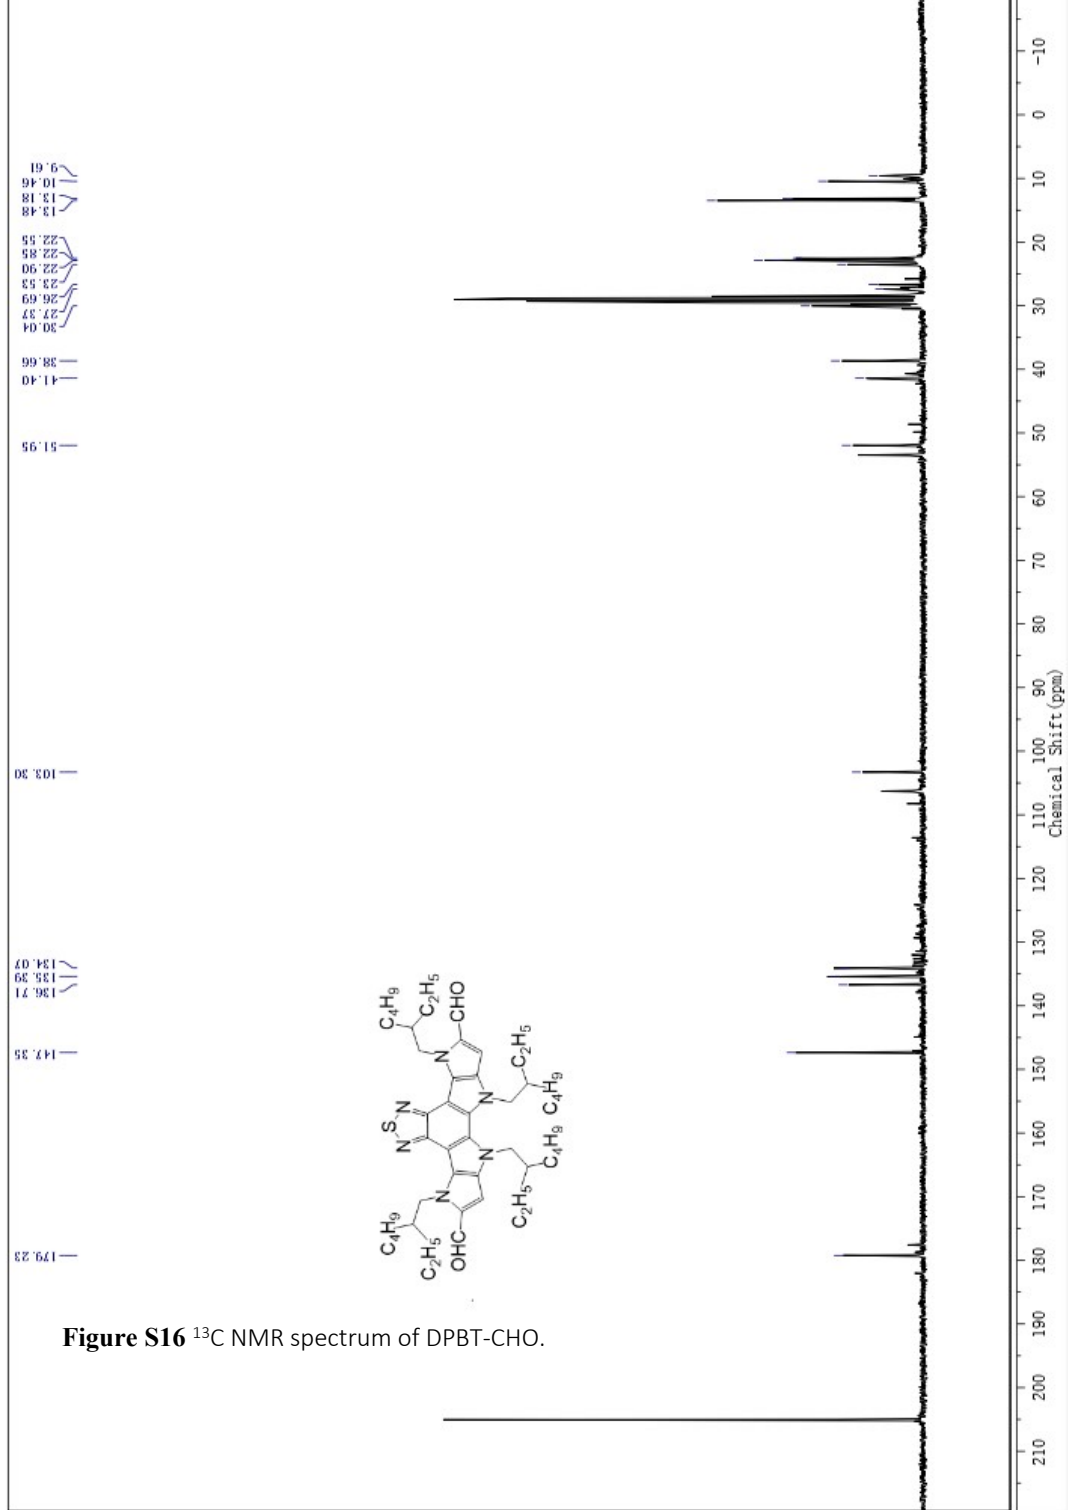

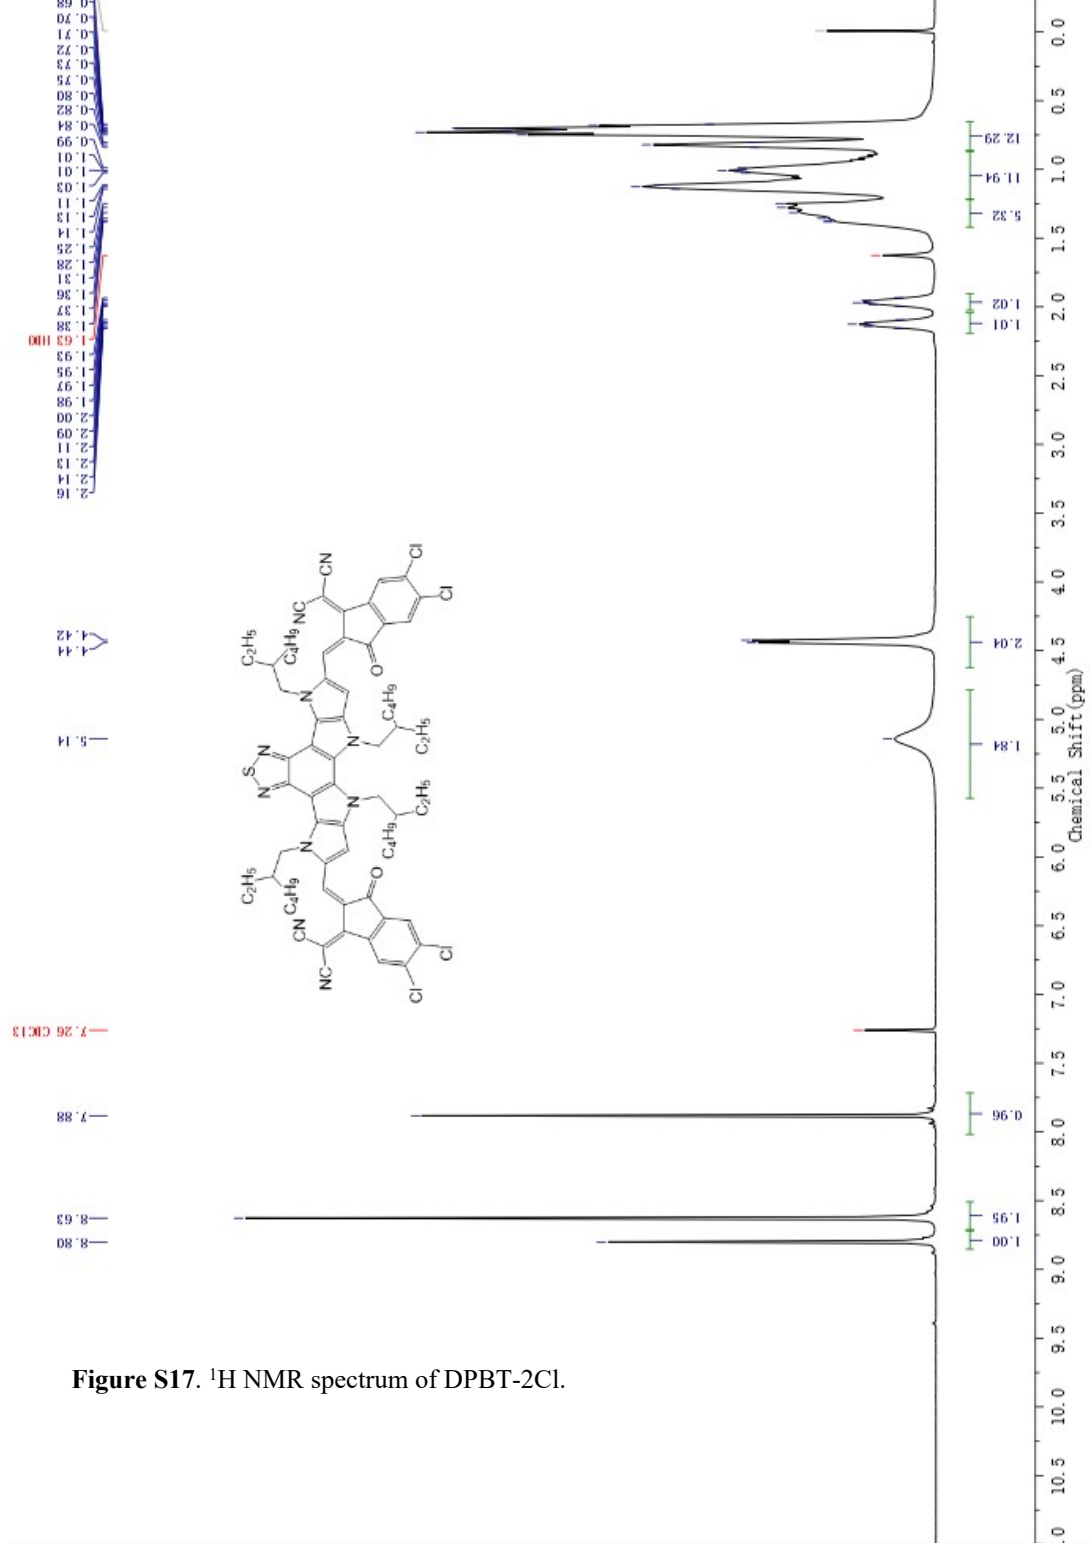

Figure S17.  $^1\text{H}$  NMR spectrum of DPBT-2Cl.

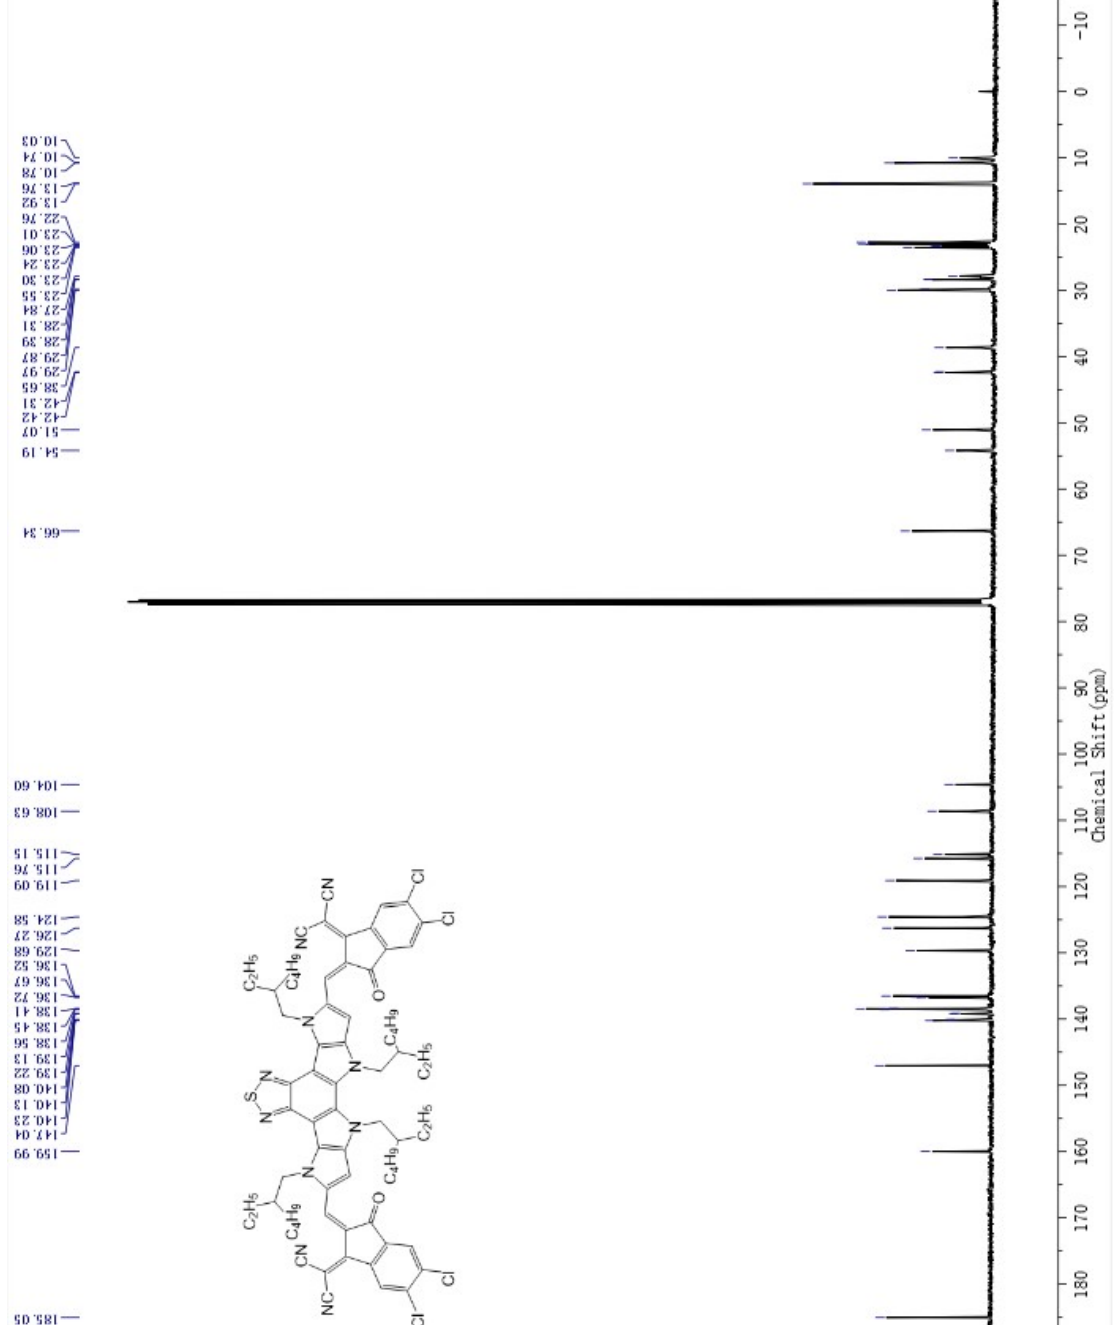

Figure S18. <sup>13</sup>C NMR spectrum of DPBT-2Cl.

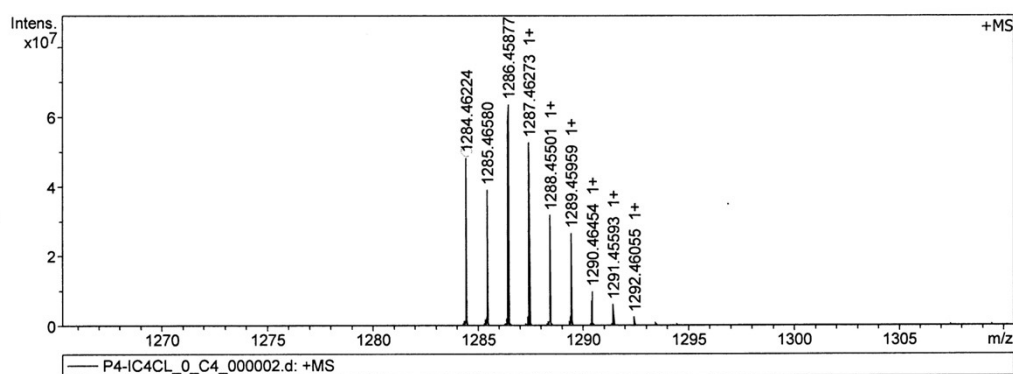

| Meas. m/z   | # | Ion Formula     | Score  | m/z         | err [ppm] | Mean err [ppm] | mSigma | rdB  | e <sup>-</sup> Conf | N-Rule |
|-------------|---|-----------------|--------|-------------|-----------|----------------|--------|------|---------------------|--------|
| 1284.462241 | 1 | C72H76Cl4N10O2S | 100.00 | 1284.462205 | -0.0      | 0.8            | 94.9   | 38.0 | odd                 | ok     |

Figure S19. HR-MS (MALDI-TOF) spectrum of DPBT-2Cl.

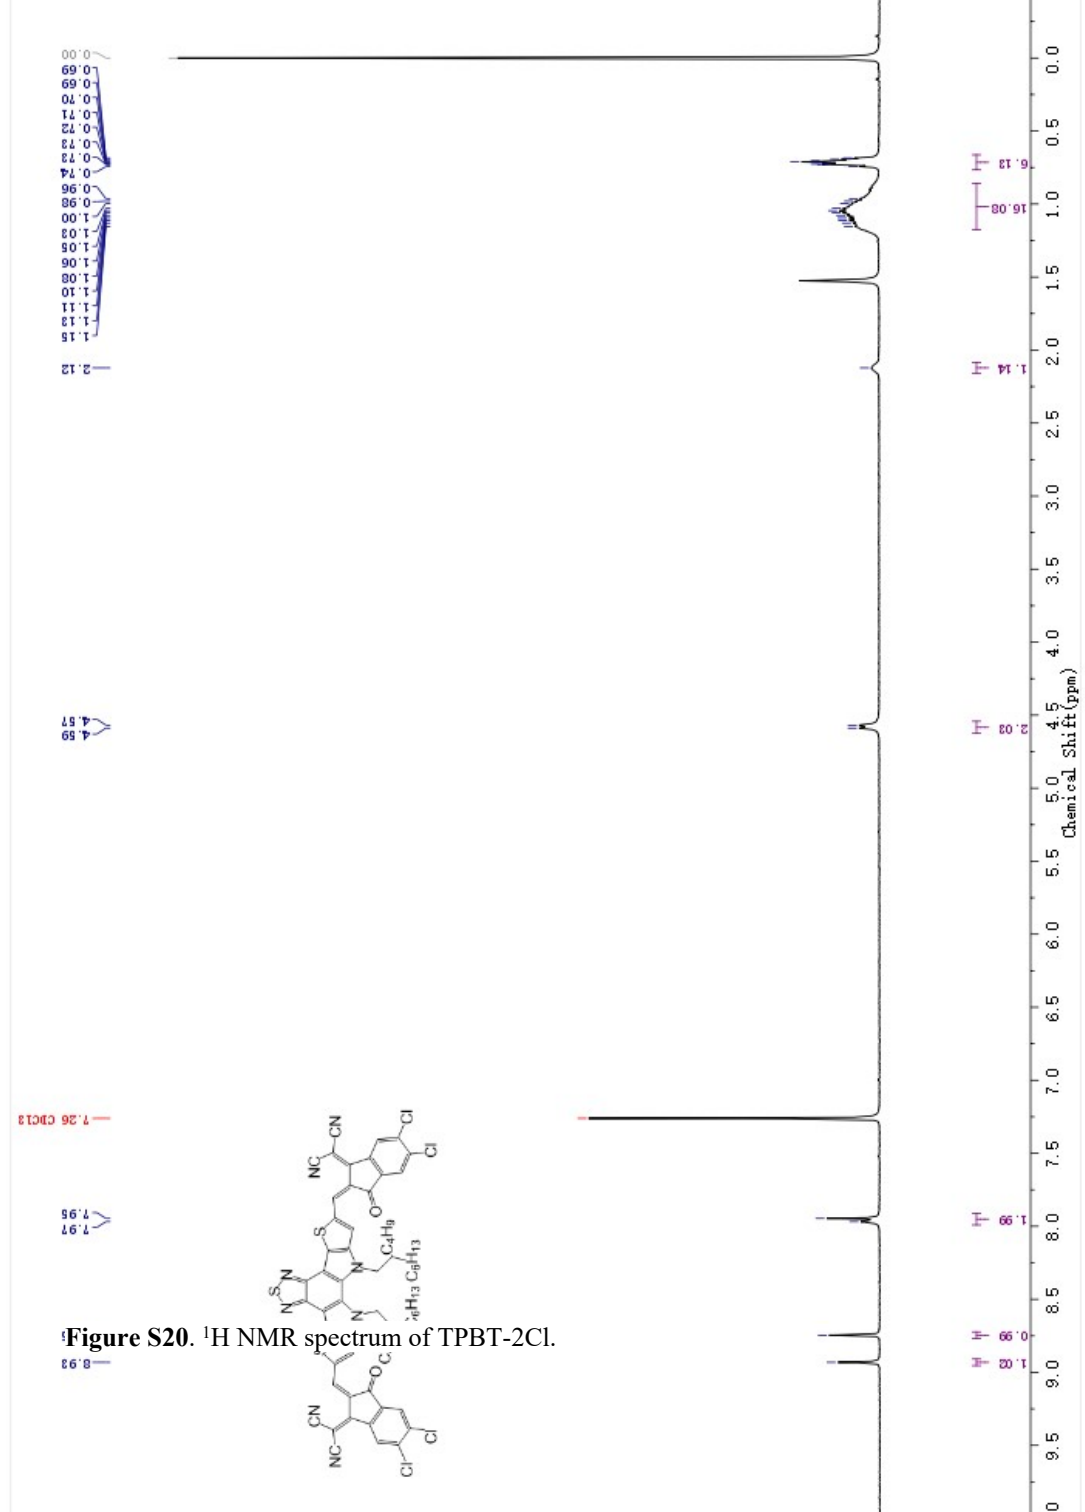

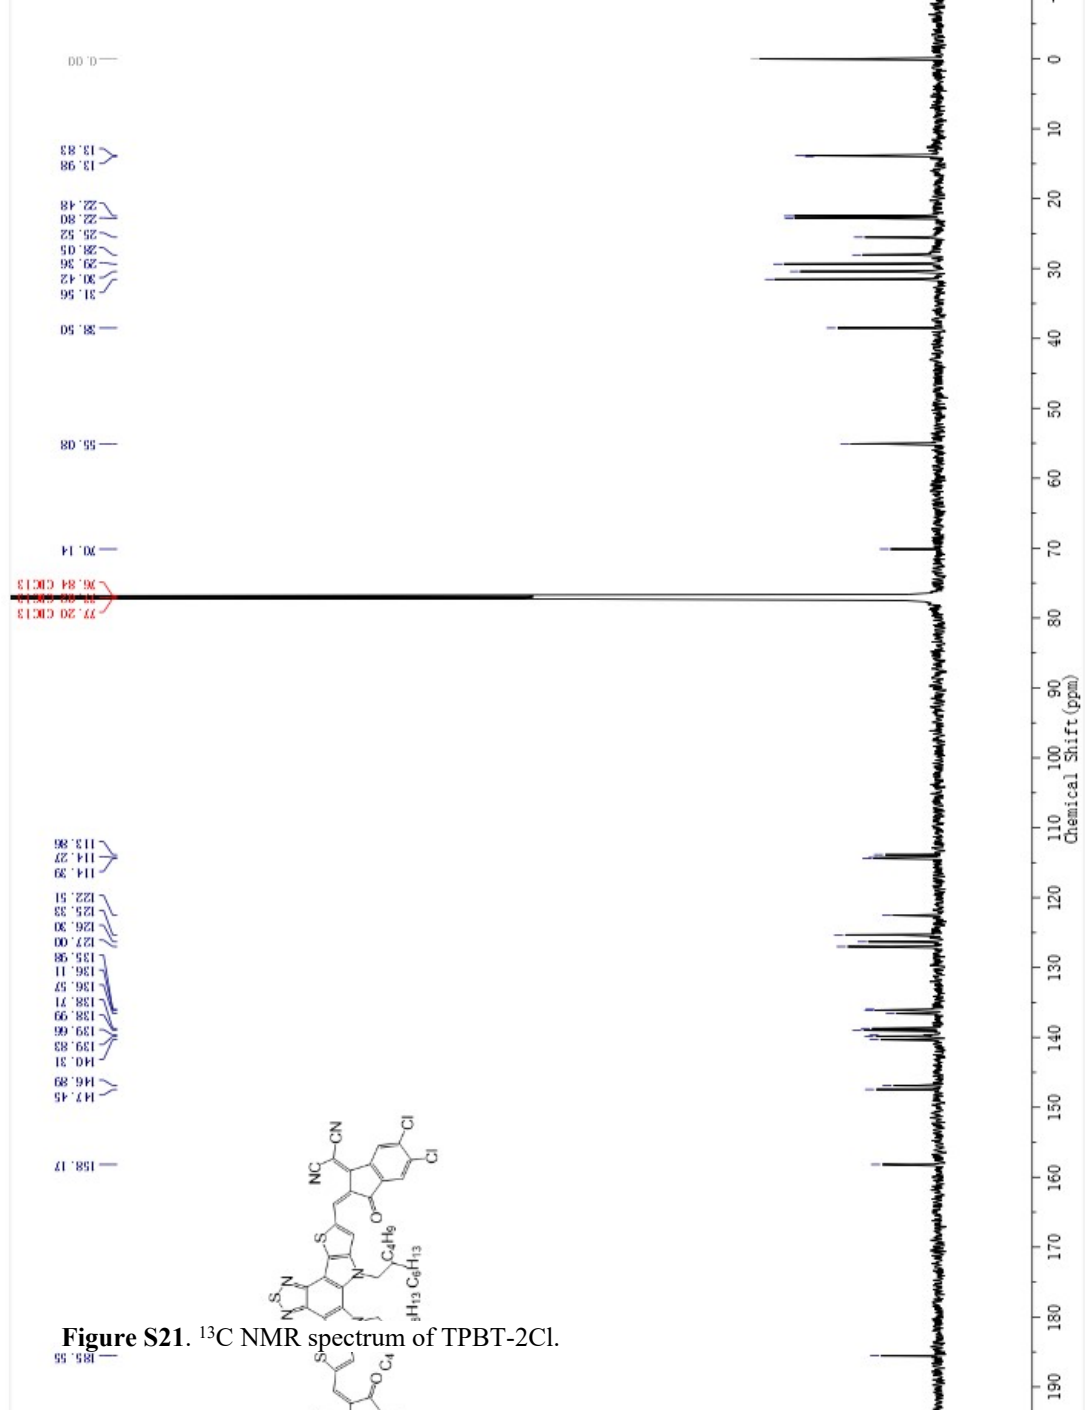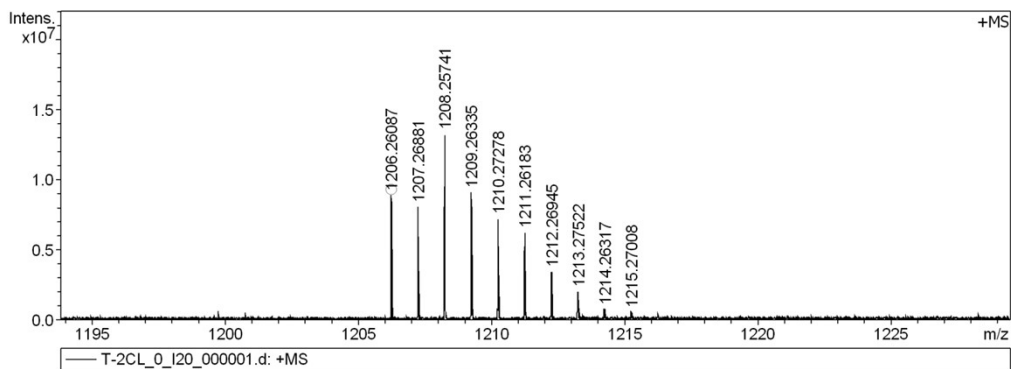

| Meas. m/z   | # | Ion Formula                                                                                  | Score  | m/z         | err [ppm] | Mean err [ppm] | mSigma | rdb  | e <sup>-</sup> Conf | N-Rule |
|-------------|---|----------------------------------------------------------------------------------------------|--------|-------------|-----------|----------------|--------|------|---------------------|--------|
| 1206.260873 | 1 | C <sub>64</sub> H <sub>58</sub> Cl <sub>4</sub> N <sub>8</sub> O <sub>2</sub> S <sub>3</sub> | 100.00 | 1206.259348 | -1.3      | -1.6           | 115.5  | 38.0 | odd                 | ok     |

**Figure S22.** HR-MS (MALDI-TOF) spectrum of TPBT-2Cl.
